# Supplementary material for: Oxidative stress induces lysosomal membrane permeabilization and ceramide accumulation in retinal pigment epithelial cells
Source: PubMed Central journal article supplement (PMC10399446; doi:10.1242/dmm.050066), 2023-07-25
Supplement: dmm-16-050066-s1.pdf [file dmm-16-050066-s1.pdf]

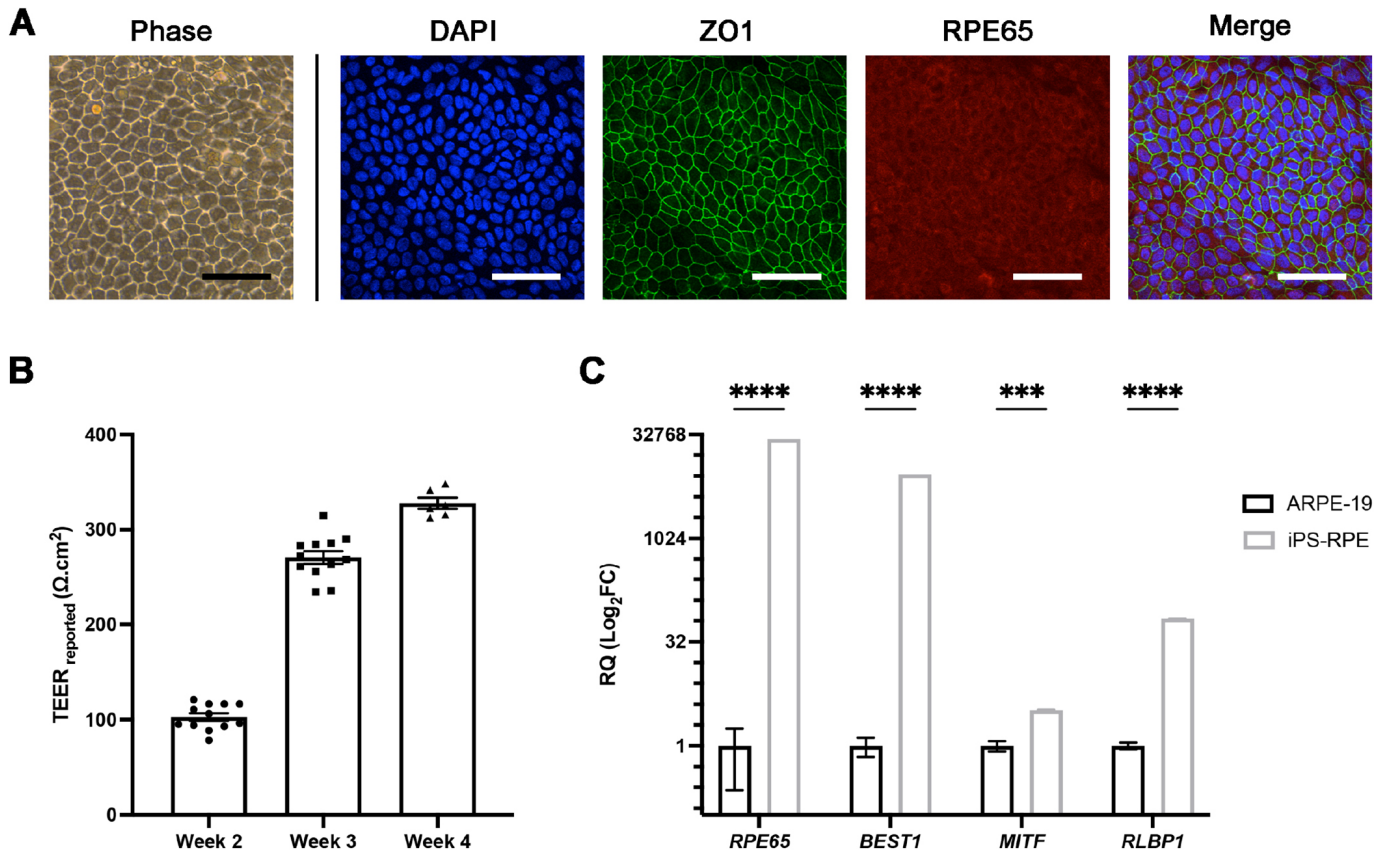

**Fig. S1. Characterization of iPS-RPE cells.** (A) Representative images of mature iPSRPE cells under phase contrast and immunostained with Z01 (green) and RPE65 (red). Scale bar is 10 μm. Nuclei are labeled with DAPI (blue). (B) Transepithelial electrical resistance (TEER) of mature iPS-RPE cells grown on transwells. (C) Gene expression of mature RPE markers in iPS-RPE cells cultured for 4 weeks compared to ARPE-19 from n=3 replicates per cell line. Graphs represent mean values ± SEM. \*\*\*p < 0.001, \*\*\*\*p < 0.0001.

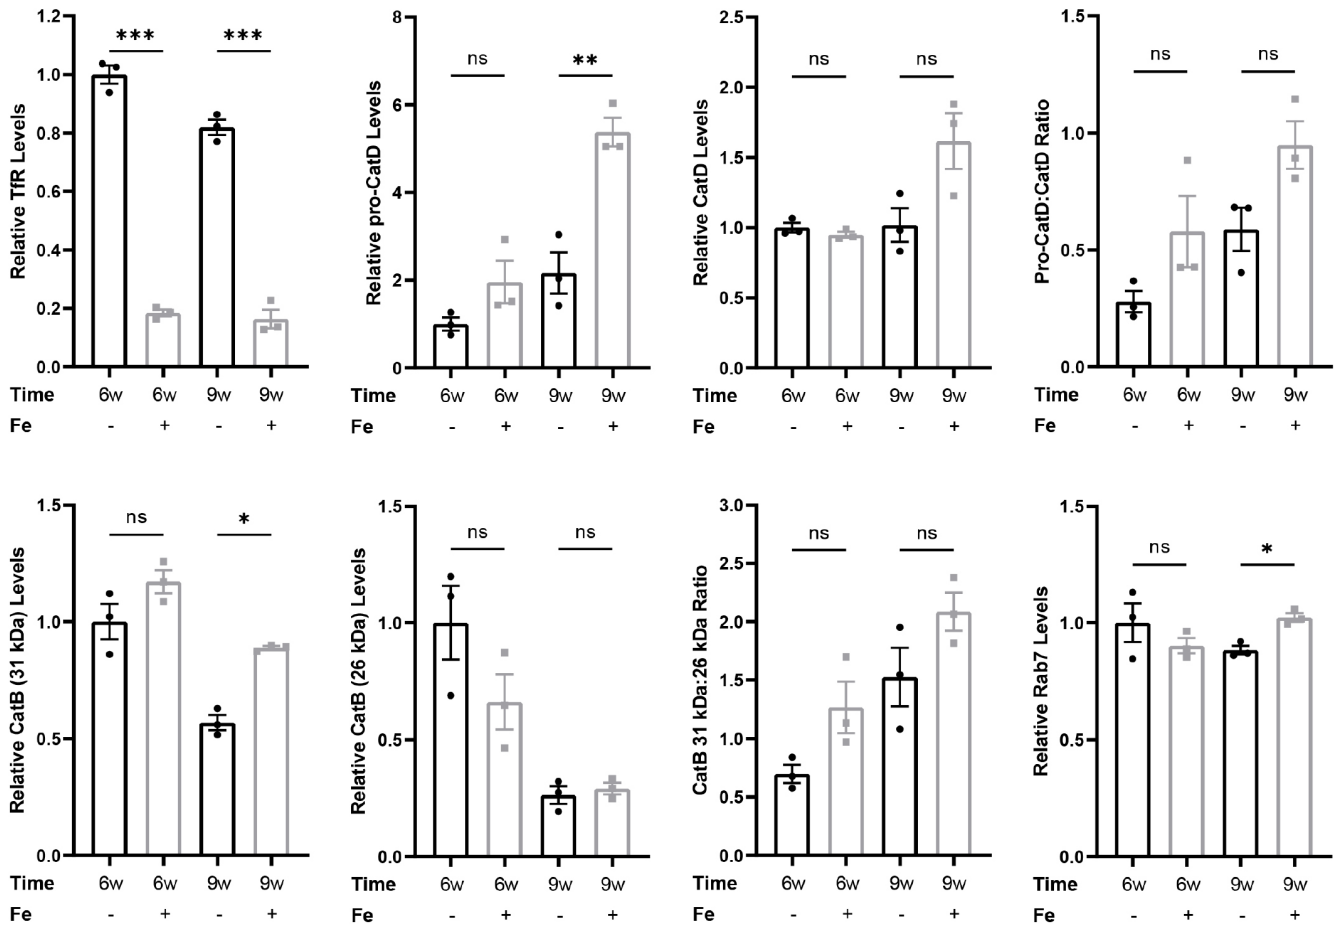

**Fig. S2. Quantification of Western blots in iron-loaded iPS-RPE.** Western blot images are shown in Fig. 1A. Graphs represent mean values  $\pm$  SEM. \* $p < 0.05$ , \*\* $p < 0.01$ , \*\*\* $p < 0.001$ .

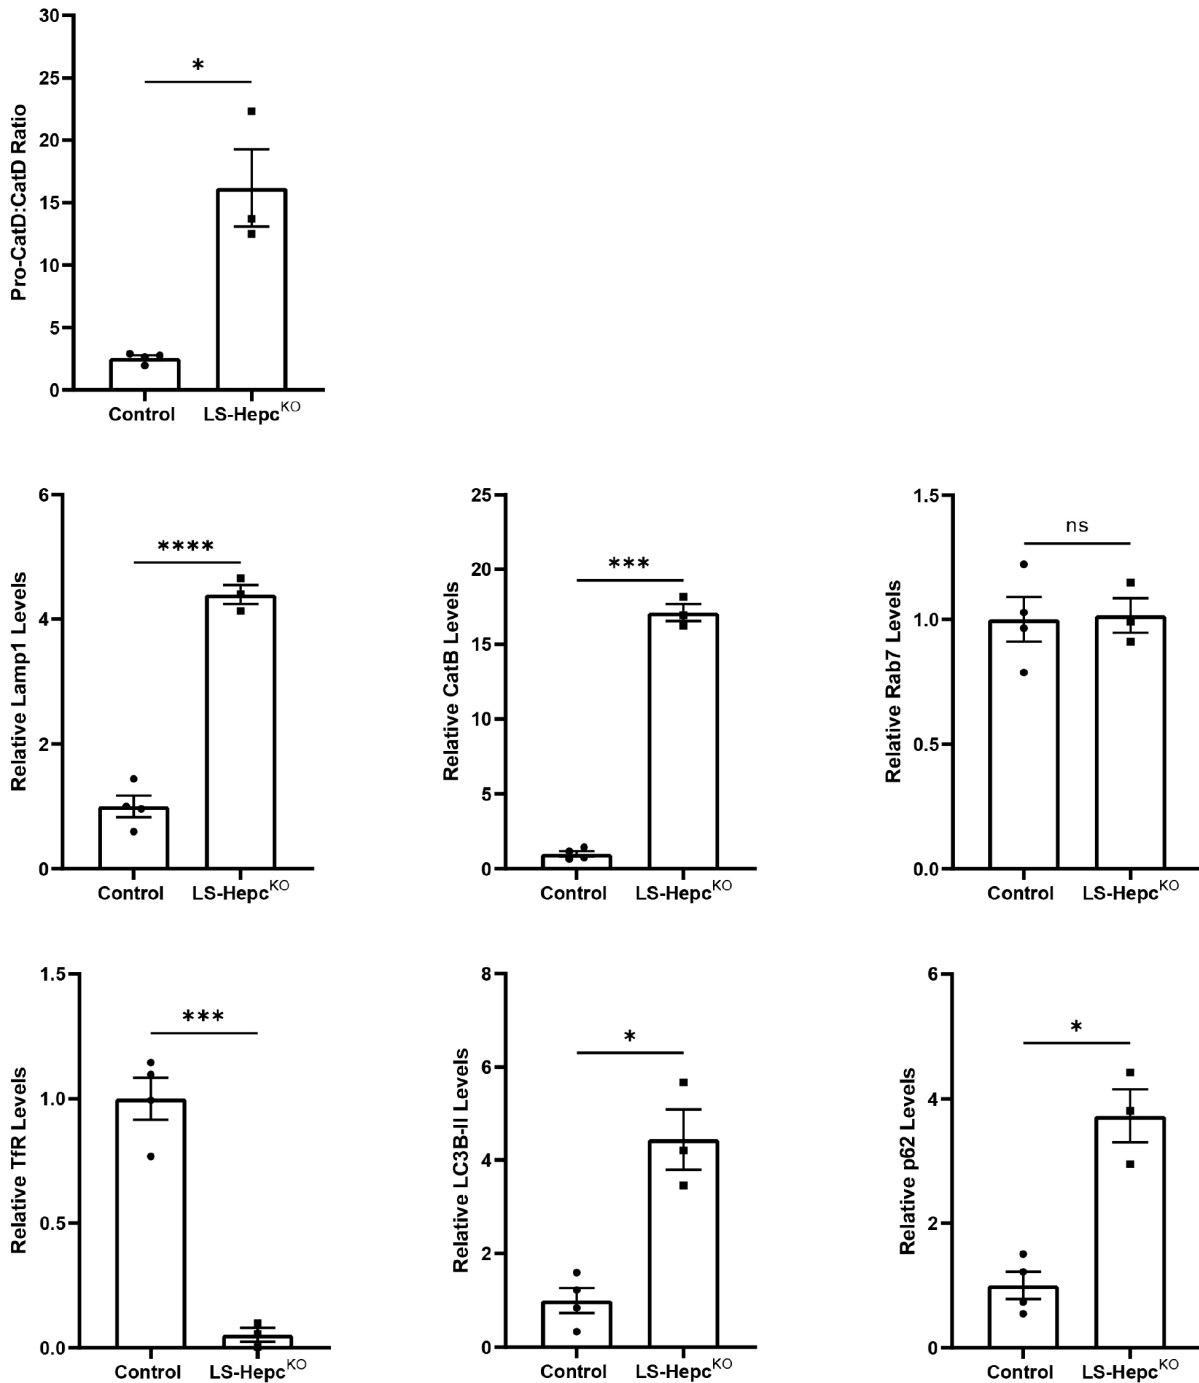

**Fig. S3. Quantification of Western blots in 12-month LS-Hepc<sup>KO</sup> mice.** Western blot images are shown in Fig. 20. Graphs represent mean values ± SEM. \* $p < 0.05$ , \*\*\* $p < 0.001$ , \*\*\*\* $p < 0.0001$ . Control mice had genotype AlbCre<sup>-</sup>, Hepc<sup>ff</sup>.

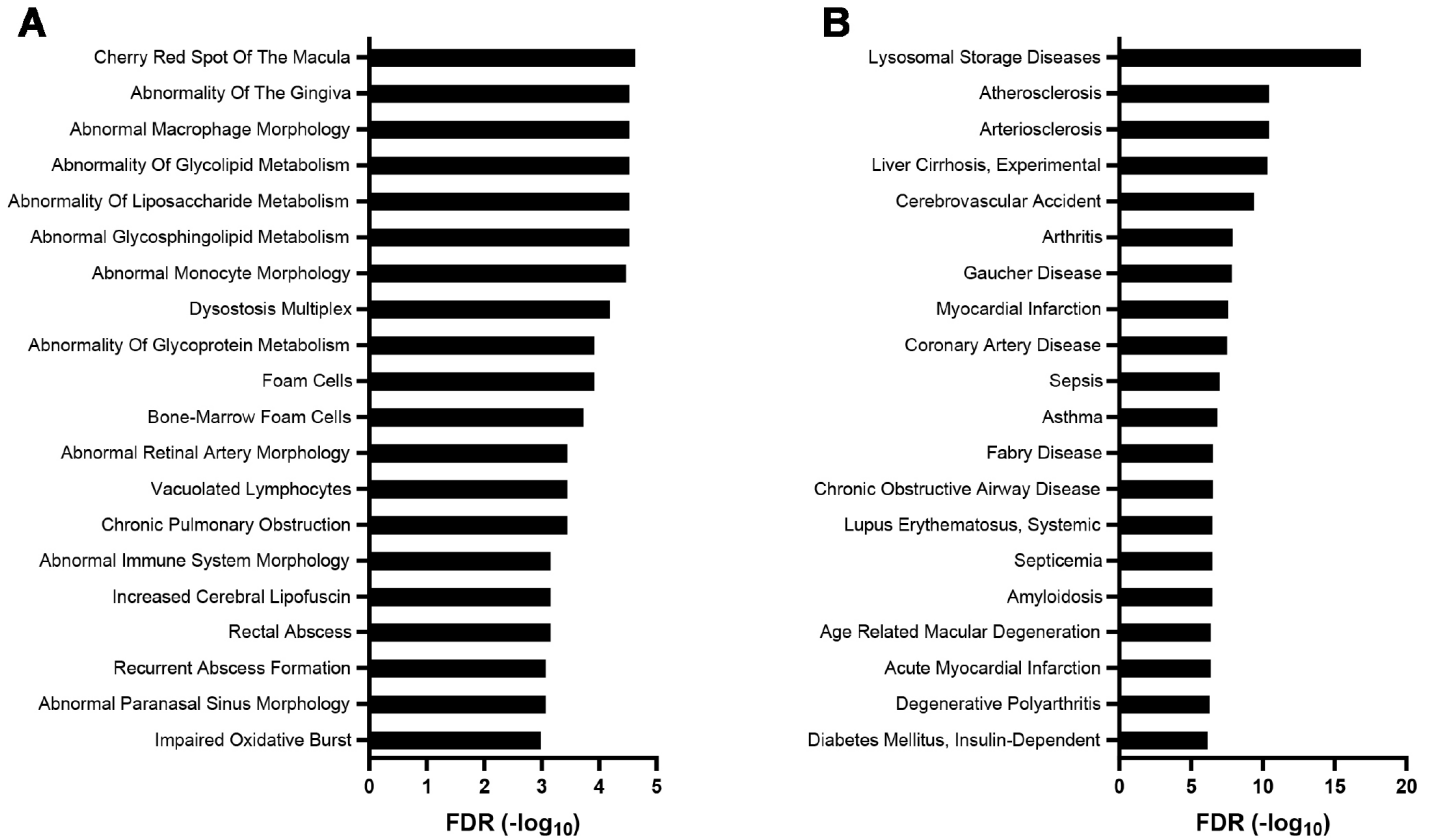

**Fig. S4. Additional proteomics enrichment analysis on LS-Hepc<sup>KO</sup> RPE.** Enrichment analysis with the ToppGene Suite on 12-month LS-Hepc<sup>KO</sup> vs control (AlbCre<sup>-</sup>, Hepc<sup>f/f</sup>) RPE for **(A)** human phenotype and **(B)** disease association. Disease associations in B are sourced from the DisGeNET BeFree system.

**Table S1. Primary antibodies used for Western blot and immunofluorescence.**

Antibodies used for immunofluorescence are designated by IF, while those used for Western blot are designated by WB.

| Antibody                           | Source                                                      | Identifier  | Dilution                   |
|------------------------------------|-------------------------------------------------------------|-------------|----------------------------|
| Mouse anti-CEP                     | Gift of John Crabb, Cleveland Clinic                        | N/A         | 1:200 (IF)                 |
| Mouse anti-methylglyoxal           | Novus Biologicals                                           | NBP2-59368  | 1:50 (IF)                  |
| Mouse anti-RPE65                   | ThermoFisher                                                | #MA1-16578  | 1:100 (IF)                 |
| Rabbit anti-4-hydroxynonenal       | Abcam                                                       | ab46545     | 1:100 (IF)                 |
| Rabbit anti-cathepsin B            | Cell Signaling                                              | D1C7Y       | 1:1000 (WB)                |
| Rabbit anti-cathepsin D            | GeneTex                                                     | GTX19555    | 1:1000 (WB),<br>1:100 (IF) |
| Rabbit anti-galectin-3             | ThermoFisher                                                | PA5-34819   | 1:100 (IF)                 |
| Rabbit anti-LC3B                   | Cell Signaling                                              | #2775       | 1:1000 (WB)                |
| Rabbit anti-light ferritin         | Gift of M. Poli and P. Arosio, University of Brescia, Italy | E17         | 1:2500 (IF)                |
| Rabbit anti-Rab7                   | Cell Signaling                                              | D95F2       | 1:1000 (WB)                |
| Rabbit anti-SQSTM1                 | Abcam                                                       | ab109012    | 1:5000 (WB)                |
| Rabbit anti-transferrin receptor   | ThermoFisher                                                | PA5-27739   | 1:1000 (WB)                |
| Rabbit anti-ZO1                    | ThermoFisher                                                | #61-7300    | 1:100 (IF)                 |
| Rat anti-Iba1                      | Abcam                                                       | ab283346    | 1:100 (IF)                 |
| Rat anti-Lamp1                     | Developmental Studies Hybridoma Bank                        | 1D4B        | 1:135 (WB),<br>1:100 (IF)  |
| Rabbit IgG HRP Linked Whole Ab     | Cytiva                                                      | NA934       | 1:5000 (WB)                |
| ECL Rat IgG, HRP Linked            | Cytiva                                                      | NA935       | 1:5000 (WB)                |
| Donkey anti-Rat Cy3                | Jackson ImmunoResearch Laboratories                         | 712-165-153 | 1:200 (IF)                 |
| Donkey anti-Rat Alexa Fluor 488    | Jackson ImmunoResearch Laboratories                         | 712-545-153 | 1:200 (IF)                 |
| Donkey anti-Rabbit Alexa Fluor 488 | Jackson ImmunoResearch Laboratories                         | 711-545-152 | 1:200 (IF)                 |
| Donkey anti-Mouse Alexa Fluor 488  | Jackson ImmunoResearch Laboratories                         | 715-545-150 | 1:200 (IF)                 |
| Goat anti-Mouse Alexa Fluor 594    | ThermoFisher                                                | A-11020     | 1:500 (IF)                 |
| Goat anti-Rabbit Alexa Fluor 488   | ThermoFisher                                                | A-11034     | 1:500 (IF)                 |

**Table S2. Proteomics on RPE from 12-month-old LS-Hepc<sup>KO</sup> RPE and age-matched controls**

[Click here to download Table S2](#)

**Table S3. Lipidomics in RPE from 12-month-old LS-Hepc<sup>KO</sup> RPE and age-matched controls**

[Click here to download Table S3](#)

**Table S4. Metabolomics in RPE from 12-month-old LS-Hepc<sup>KO</sup> RPE and age-matched controls**

[Click here to download Table S4](#)
